# Supplementary figures and images for: BSA-templated ultrasmall Ag/Gd2O3 as a self-enabled nanotheranostic for MR/CT/PA tri-modality imaging and photothermal therapy
Source: Royal Society of Chemistry journal article supplement (doi:10.1039/d2bm00702a), 2022-01-01

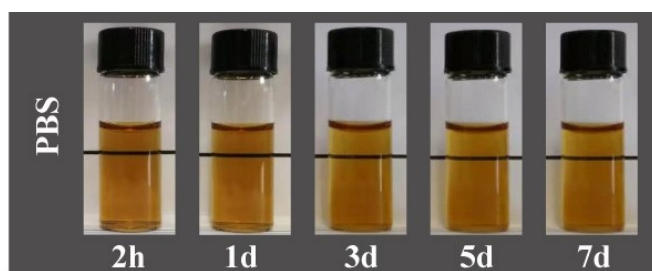

Supplement: d2bm00702a2.pdf [file d2bm00702a2.pdf]

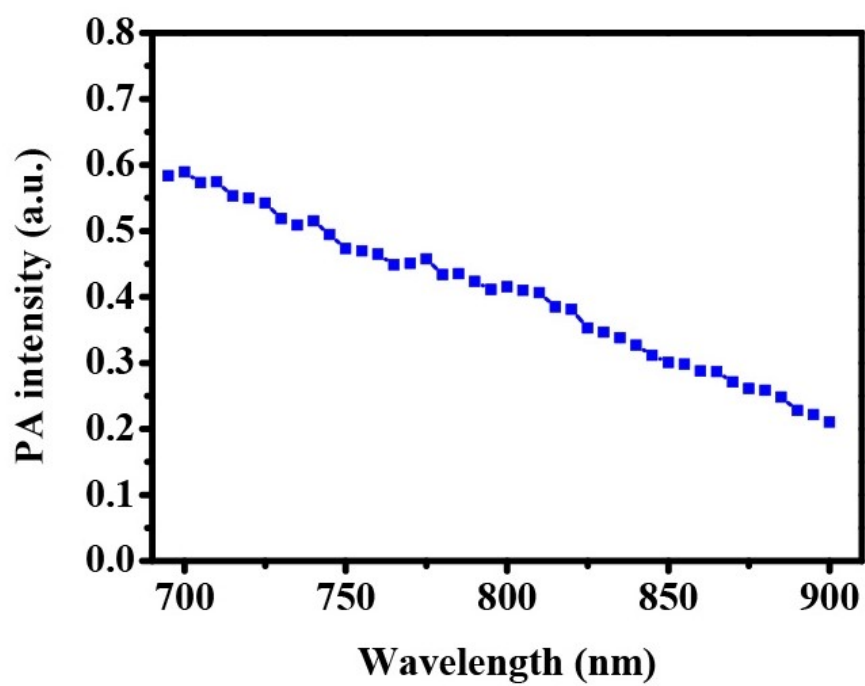

Supplement: d2bm00702a3.pdf [file d2bm00702a3.pdf]

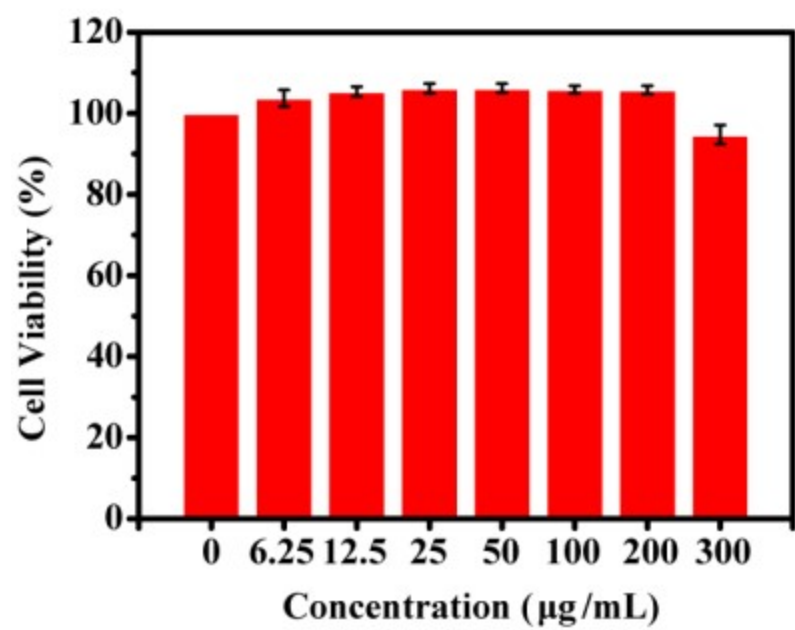

Supplement: d2bm00702a4.pdf [file d2bm00702a4.pdf]

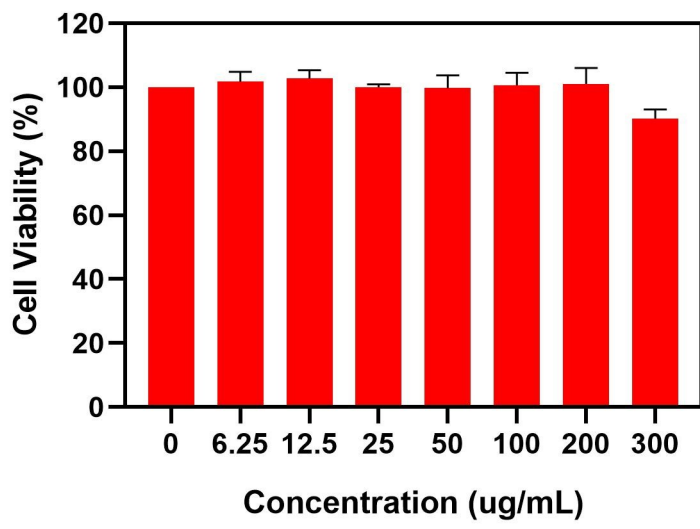

Supplement: d2bm00702a5.pdf [file d2bm00702a5.pdf]
